# Supplementary material for: Apparent discrepancy of Tibetan ice core δ 18 O records may be attributed to misinterpretation of chronology
Source: Copernicus journal article supplement (doi:10.5194/tc-2018-295), 2019-02-11
Supplement: Supplementary file 1 [file tc-2018-295-supplement.pdf]

*Supplement of*

**Apparent discrepancy of Tibetan ice core  $\delta^{18}\text{O}$  records may be  
attributed to misinterpretation of chronology**

5 Shugui Hou et al.

Correspondence to: Shugui Hou (shugui@nju.edu.cn)

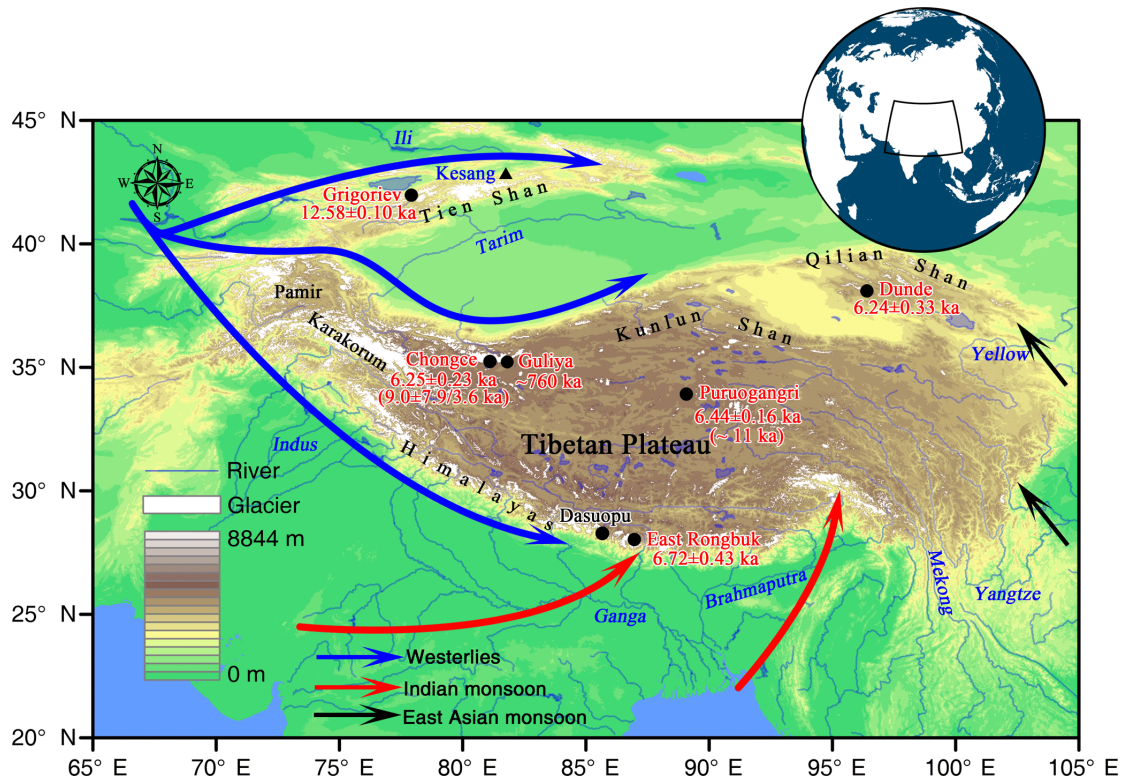

Figure S1. Map showing the locations of ice core drilling sites. The numbers for each

10 site except Guliya are the measured oldest  $^{14}\text{C}$  ages, while the number inside the  
bracket below the Chongce site is the estimated ice age at the ice-bedrock contact  
(Hou et al., 2018). Data of glaciers are from the Global Land Ice Measurements from  
Space (GLIMS). The topographic data were extracted using ETOPO1 elevations  
global data.

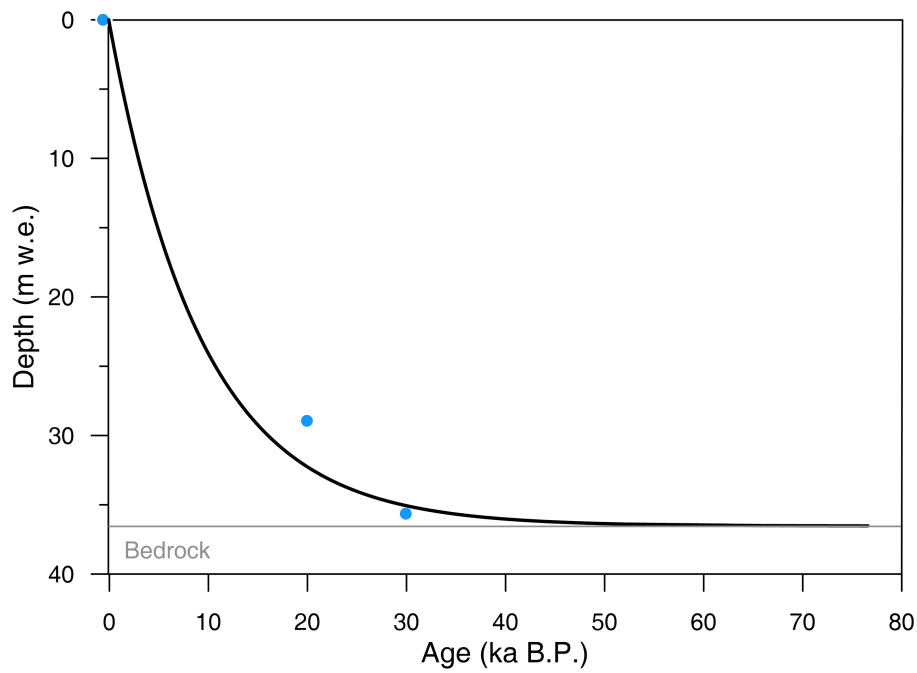

Figure S2. The depth–age relationship of the 2015 Guliya summit core. The confidence interval of the 2p model fit cannot be achieved due to lack of data. The depth in m w. e. (water equivalent) was calculated from the density profile of the
